# Supplementary material for: Influence of Mirror Therapy (Specular Face Software) on Electromyographic Behavior of the Facial Muscles for Facial Palsy
Source: MDPI journal article supplement (doi:10.3390/brainsci11070930), 2021-07-14

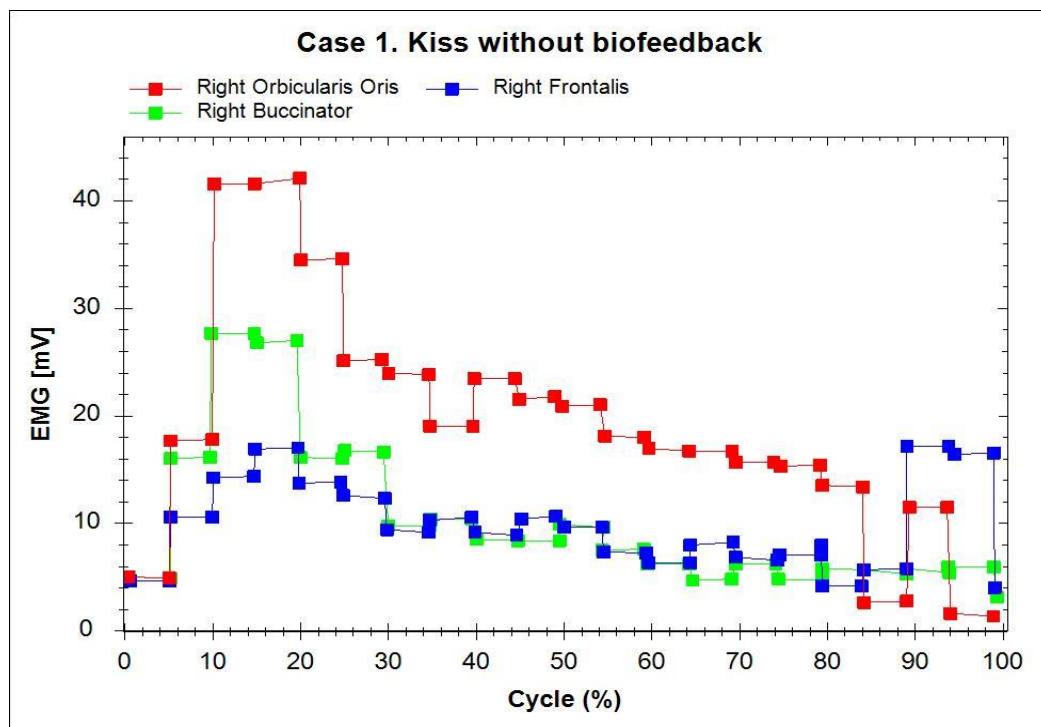

Muscle comparison of the mean muscle activity with and without feedback. Data are presented in means  $\pm$  standard deviation and d Cohen size effect.

| Muscle Pair           | means $\pm$ standard<br>(without-with feedback) | d Cohen |
|-----------------------|-------------------------------------------------|---------|
| Orbicularis Oris (mV) | 19.08 $\pm$ 10.5                                | -0.36*  |
|                       | 21.46 $\pm$ 7.47                                |         |
| Buccinator (mV)       | 9.73 $\pm$ 6.15                                 | -0.21   |
|                       | 10.82 $\pm$ 1.81                                |         |
| Frontalis (mV)        | 9.45 $\pm$ 3.33                                 | 2.19**  |
|                       | 1.91 $\pm$ 0.91                                 |         |

\*p<0.05; \*\*p<0.01

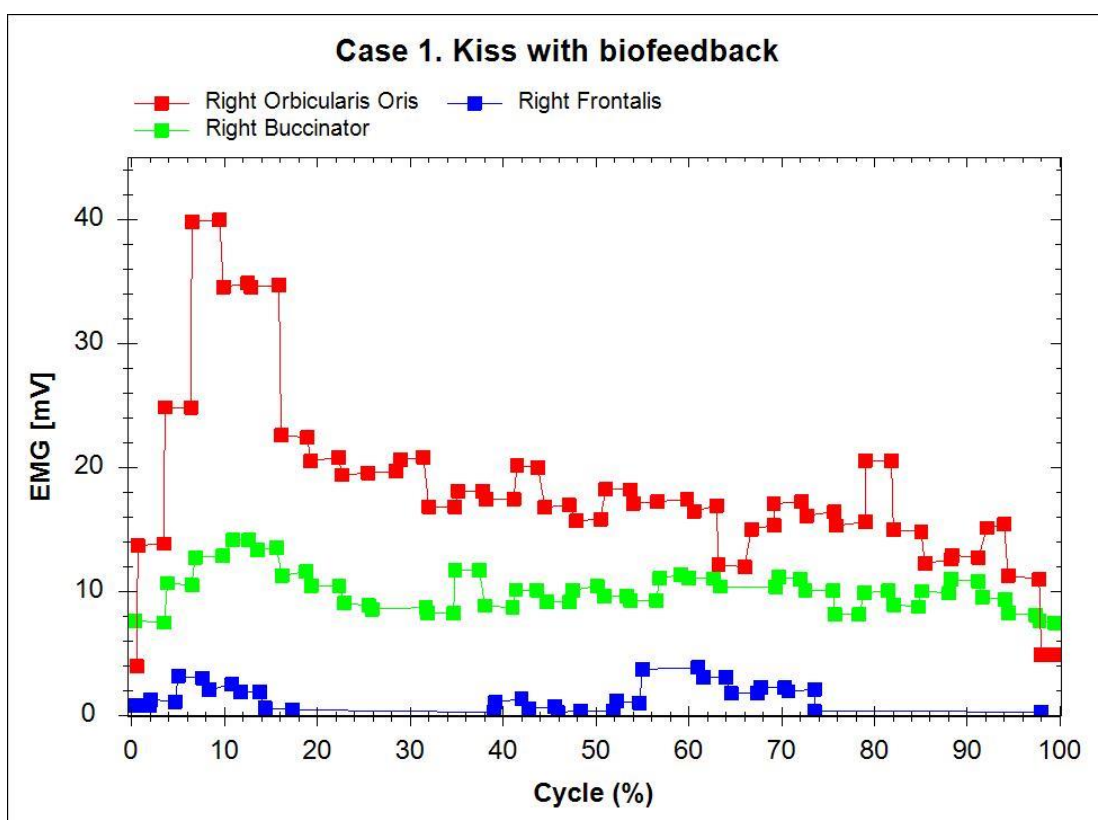

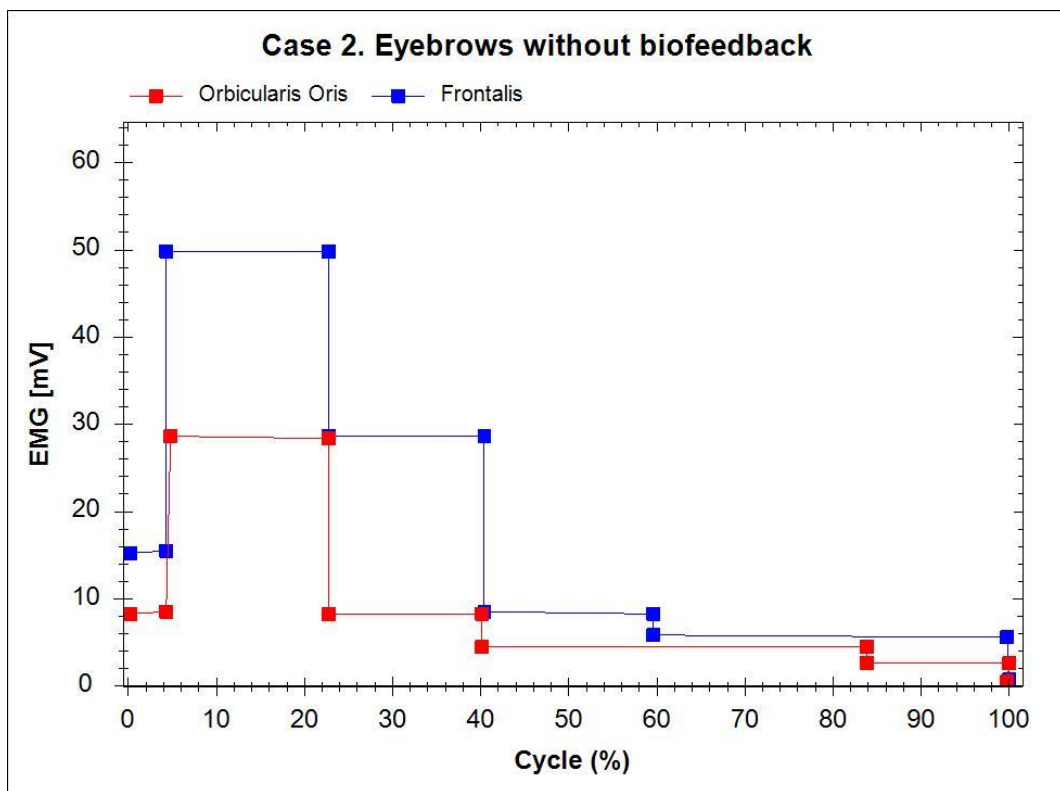

Muscle comparison of the mean muscle activity with and without feedback. Data are presented in means  $\pm$  standard deviation and d Cohen size effect.

| Muscle Pair           | means $\pm$ standard<br>(without-with feedback) | d Cohen |
|-----------------------|-------------------------------------------------|---------|
| Frontalis (mV)        | 19.91 $\pm$ 17.18                               | -1.22** |
|                       | 34.55 $\pm$ 21.72                               |         |
| Orbicularis Oris (mV) | 10 $\pm$ 9.79                                   | 0.24    |
|                       | 7.91 $\pm$ 2.81                                 |         |

\*p<0.05; \*\*p<0.01

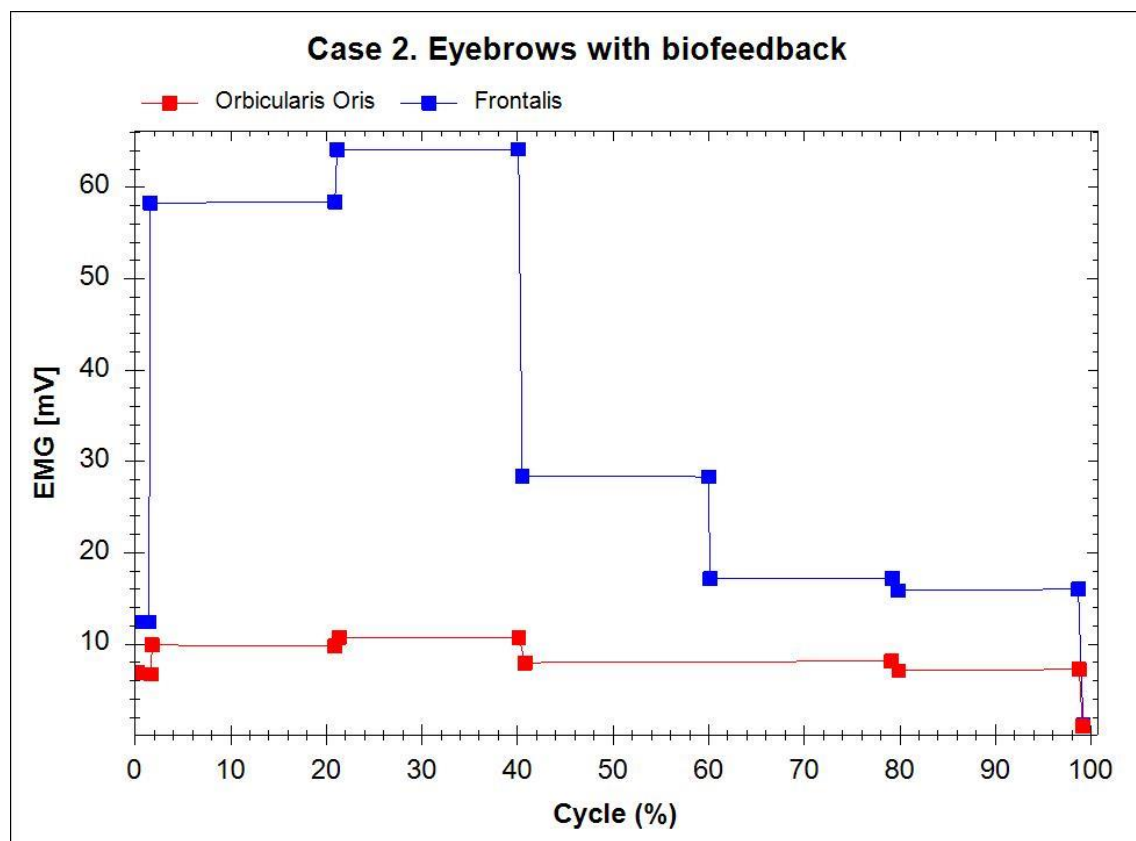

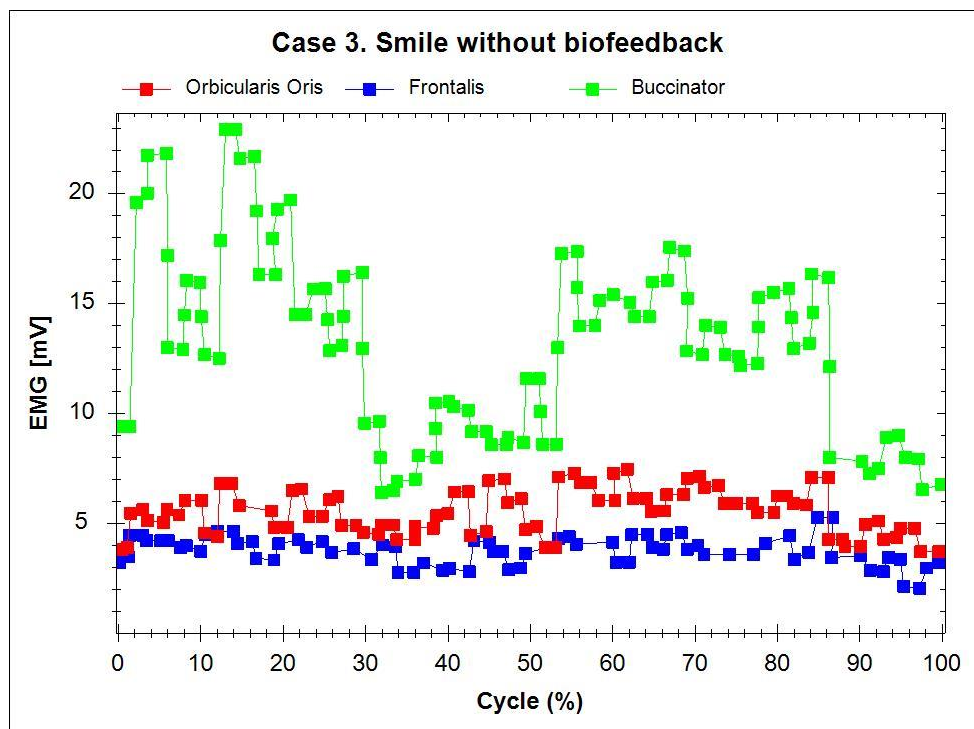

Muscle comparison of the mean muscle activity with and without feedback. Data are presented in means  $\pm$  standard deviation and d Cohen size effect.

| Muscle Pair           | means $\pm$ standard<br>(without-with feedback) | d Cohen |
|-----------------------|-------------------------------------------------|---------|
| Buccinator (mV)       | 13.64 $\pm$ 4.44                                | -0.23*  |
|                       | 14.77 $\pm$ 3.52                                |         |
| Orbicularis Oris (mV) | 5.61 $\pm$ 0.9                                  | 0.34**  |
|                       | 5.21 $\pm$ 0.94                                 |         |
| Frontalis (mV)        | 3.95 $\pm$ 0.49                                 | 0.53**  |
|                       | 3.49 $\pm$ 0.72                                 |         |

\* $p < 0.05$ ; \*\* $p < 0.01$

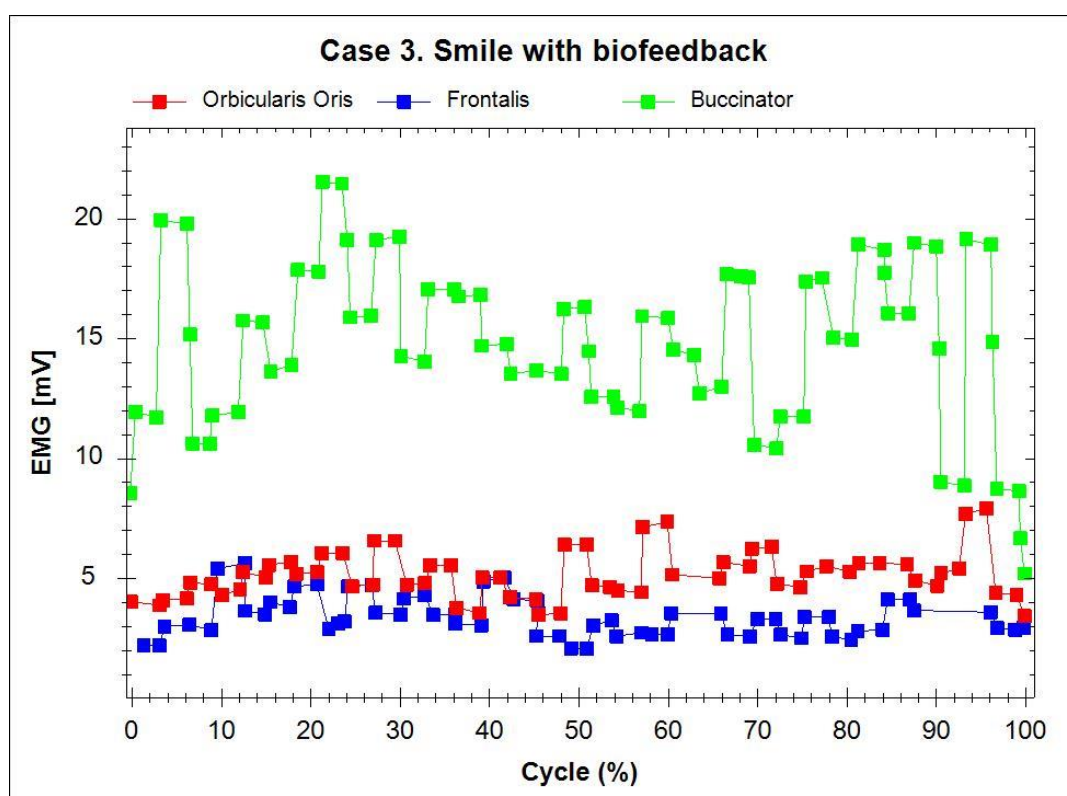

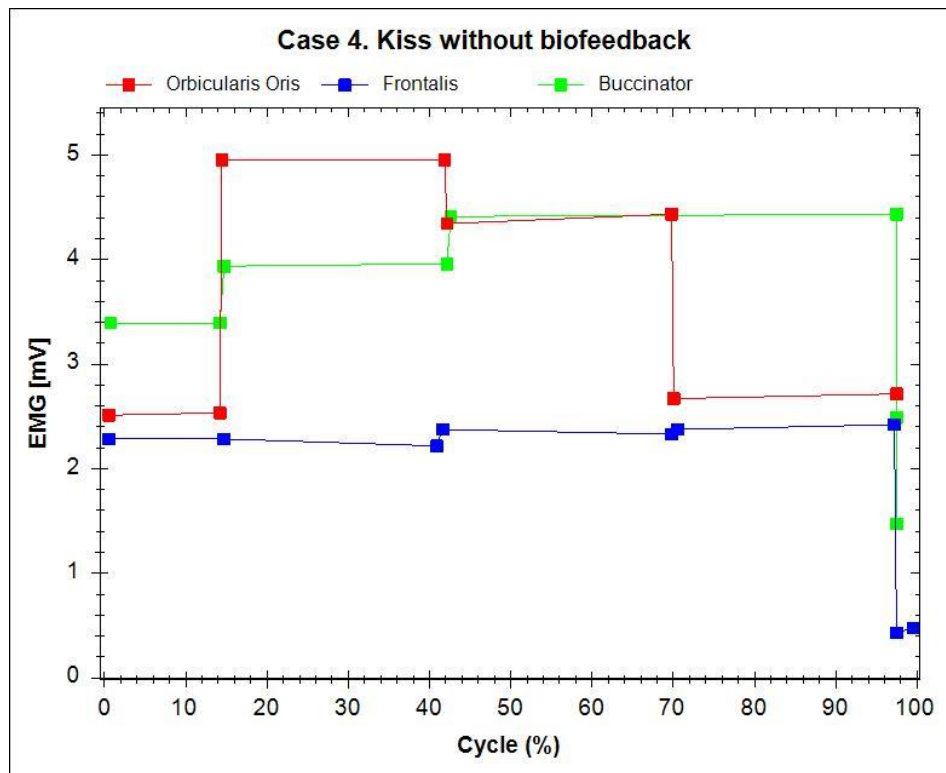

Muscle comparison of the mean muscle activity with and without feedback. Data are presented in means  $\pm$  standard deviation and d Cohen size effect.

| Muscle Pair           | means $\pm$ standard<br>(without-with feedback) | d Cohen |
|-----------------------|-------------------------------------------------|---------|
| Orbicularis Oris (mV) | 3.65 $\pm$ 1.15                                 | -0.26   |
|                       | 4.03 $\pm$ 1.02                                 |         |
| Buccinator (mV)       | 3.53 $\pm$ 0.98                                 | -0.16   |
|                       | 3.71 $\pm$ 0.29                                 |         |
| Frontalis (mV)        | 2.09 $\pm$ 0.64                                 | -0.94*  |
|                       | 2.73 $\pm$ 0.09                                 |         |

\* $p < 0.05$ ; \*\* $p < 0.01$

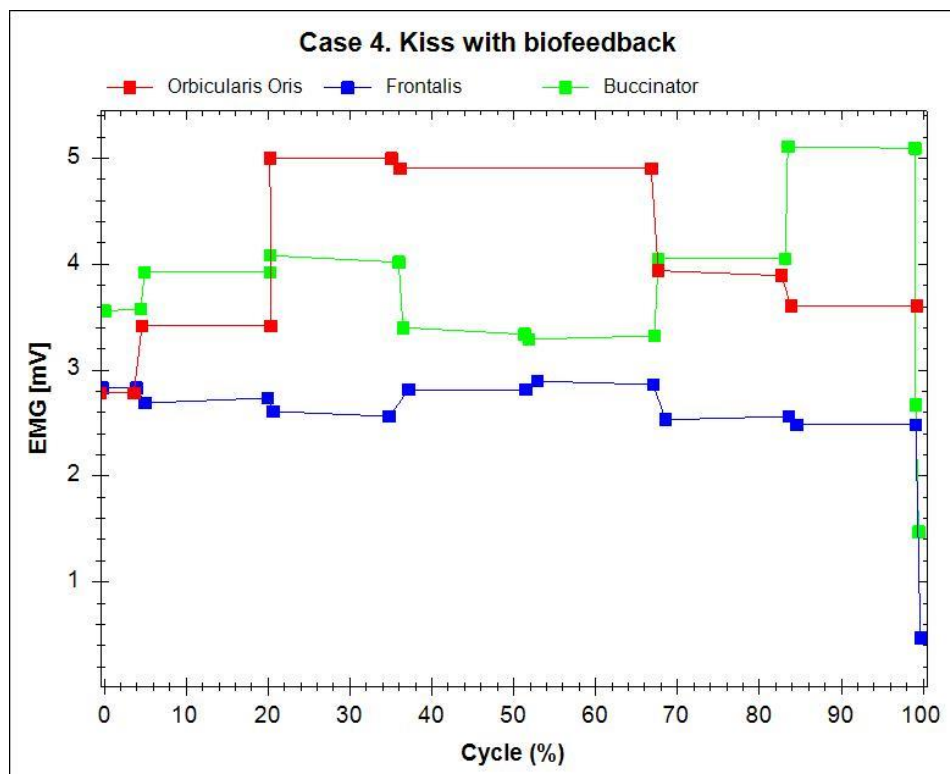

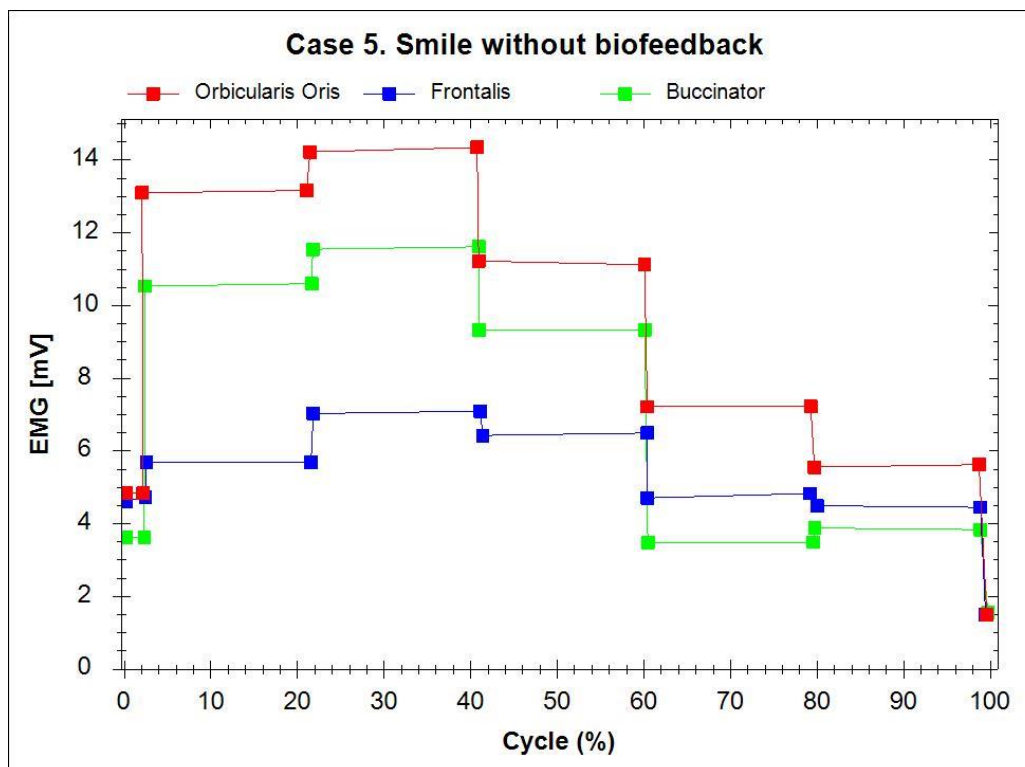

Muscle comparison of the mean muscle activity with and without feedback. Data are presented in means  $\pm$  standard deviation and d Cohen size effect.

| Muscle Pair           | means $\pm$ standard<br>(without-with feedback) | d Cohen |
|-----------------------|-------------------------------------------------|---------|
| Buccinator (mV)       | 7.02 $\pm$ 3.49                                 | 0.28    |
|                       | 6.51 $\pm$ 2.63                                 |         |
| Orbicularis Oris (mV) | 8.75 $\pm$ 4.19                                 | 0.27    |
|                       | 8.35 $\pm$ 3.05                                 |         |
| Frontalis (mV)        | 5.62 $\pm$ 1                                    | 0.19    |
|                       | 5.36 $\pm$ 1.87                                 |         |

\*p<0.05; \*\*p<0.01

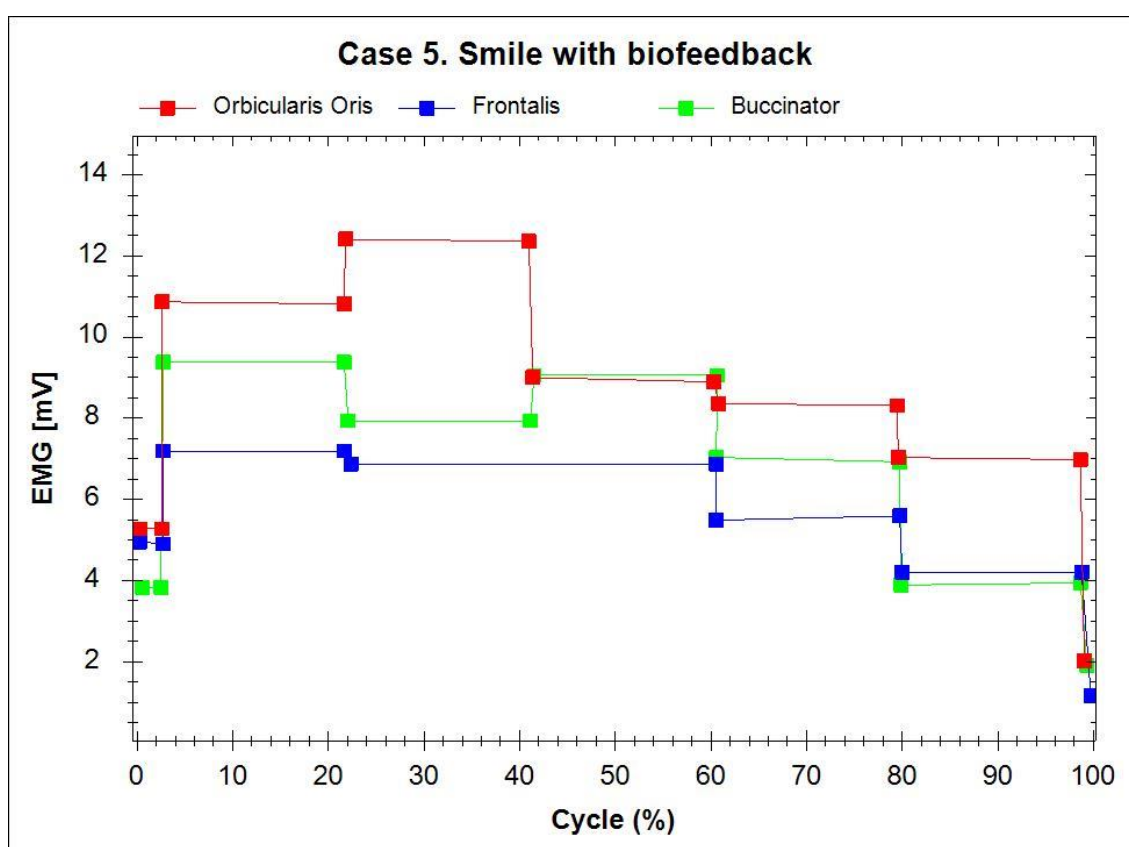

Supplement: s1 [file s1]
